# Supplementary material for: Synthesis, characterisation and catalytic potential of hydrazonato-vanadium(v) model complexes with [VO]3+ and [VO2]+ cores
Source: Royal Society of Chemistry journal article supplement (doi:10.1039/b416292g), 2005-01-01
Supplement: b416292g.doc [file b416292g.doc]

# Synthesis, characterisation and catalytic potential of hydrazonato-vanadium(V) model complexes with [VO]3+ and [VO2]+ cores 

Mannar R. Maurya,**a* Shalu Agarwal,*a* Cerstin Bader,*b* Martin Ebel*b* and Dieter Rehder*b*

*a*Department of Chemistry, Indian Institute of Technology Roorkee, Roorkee 247 667, India. E-mail: rkmanfcy@iitr.ernet.in

*b*Institut für Anorganische und Angewandte Chemie, Universität Hamburg, Martin-Luther-King-Platz 6, 20146 Hamburg, Germany. E-mail: [dieter.rehder@chemie.uni-hamburg.de](mailto:dieter.rehder@chemie.uni-hamburg.de)

**Supplementary Material**

**Fig. S1** Plot of corrected magnetic susceptibility (**Mcorr) as a function of temperature (K) for **1**.

**IR spectra**

The IR spectra of the ligands show two bands at 1684 and 3270 (H2sal-nah, **I**) and 1663 and 3250 cm-1 (H2sal-fah, **II**) due to **(C=O) and **(N-H) stretches, respectively. This is indicative of their ketonic nature in the solid state, cf. Scheme I. The disappearance of both bands on complex formation is due to enolisation and replacement of H by the metal ion. A new band appearing in the region 1224–1281 cm-1 is assigned to the **(C-Oenolic) mode. The **(C=Nazomethine) stretch of the ligands appears at 1610–1620 cm-1, and this band is shifted to lower wave numbers by 2–10 cm-1 in the complexes, thereby indicating the coordination of the azomethine nitrogen. A ligand band appearing at 967 (in **I**) and 1010 cm-1 (in **II**), corresponding to the **(N-N) stretch, undergoes a shift to higher wave numbers by 6–40 cm-1 upon complex formation.1 A high frequency shift of the **(N-N) band is expected because of the diminished repulsion between the lone pairs of adjacent nitrogen atoms.2 A medium intensity band of the free ligand, covering the region 2500–2900 cm-1, is assigned to an intramolecular hydrogen bond involving the phenolic OH group. As expected, this band is absent in the complexes. In the complexes **3**, **6**, **7** and **8**, however, these bands are still present, indicating hydrogen bonding between the phenolate-O and the aquapotassium cation. The IR spectra of complexes **7** and **8** show a medium intensity band at 3090 (in **7**) and at 3108 cm-1 (in **8**), testifying the protonation of one of the nitrogens of the =N‑N= function. **1**, **3**, **4** and **6** exhibit a medium intensity band at ca. 3400 cm-1 due to the presence of H2O in these complexes.

For the dioxovanadium(V) complexes **3**, **6**, **7** and **8**, there are two sharp bands in the 905–935 cm-1 region for the *cis*-{VO2}+ structural unit. In the [(VOL)2**-O] type complexes **2** and **5**, an intense band arises at 968 (**2**) and 964 cm-1 (**5**), which is assigned the **(V=O) mode. In addition, there is a broad band at 850 (**2**) and 757 cm-1 (**5**), which is assigned to **[V-(**-O)-V]. There is one sharp **(V=O) band in the oxovanadium(IV) complexes at 988 (**1**) and 966 cm-1 (**4**).

____________________________________-

1. M. R. Maurya, S. Gopinathan, C. Gopinathan and R. C. Maurya, *Polyhedron* 1993, **12**, 159.
2. S. P. Perlepes, D. Nicholls and M. R. Harison, *Inorg. Chim. Acta* 1985, **102**, 137.

**Table S1** 1H NMR chemical shifts

| Compounda | -OH | -NH | -CH=N- | Aromatic |
| --- | --- | --- | --- | --- |
| H2sal-nah **I**  [{VO(sal-nah)}2**-O] **2**  (**)b  [K(H2O)][VO2(sal-nah)] **3**  (**)  H2sal-fah **II**  [K(H2O)] [VO2(sal-fah)] **6**  (**)  [VO2(Hsal-fah)] **8** | 12.30(s, 1H)  12.18(s, 1H) | 11.20(s, 1H)  11.20(s, 1H) | 8.68(s, 1H)  8.97(s, 1H)  (0.29)  9.03(s, 1H)  (0.35)  8.68(s, 1H)  8.93(s, 1H)  (0.25)  8.92c, 8.84 | 9.12(d, 1H), 8.80(dd, 1H), 8.30(td, 1H), 7.60(t, 2H), 7.33(t, 1H), 6.96(q, 2H)  9.23(b, 1H), 8.81(s, 1H), 8.66(b, 1H), 8.49(m, 1H), 7.63(dd, 1H), 7.56(m, 1H), 7.03(t, 1H), 6.95(d, 1H)  9.15(b, 1H), 8.67(b, 1H), 8.29(b, 1H), 7.59(d, 2H), 7.36(b, 1H), 6.81(b, 2H)  7.99(s, 1H), 7.56(d, 1H), 7.35(m, 2H), 6.95(q, 2H), 6.74(d, 1H)  7.82(b, 1H), 7.54(b, 1H), 7.34(b, 1H), 6.99(b, 1H), 6.79(b, 2H), 6.63(b, 1H)  6.6 – 7.9 (complex m) |

a Letters given in parenthesis indicate the signal structure: s = singlet, d = doublet, t = triplet, dd = doublet of doublets, m = multiplet, b = broad (unresolved). – b (**) = **(complex)  **(ligand). c –CH=N- of **10**. Two additional signals at **  = 3.2 and 5.3 ppm correspond to the methyl and methoxy protons of **10**; see also text.

**Table S2**  13C NMR chemical shifts; for the atom labeling see scheme below

| Compound | C1 C8 C3 C9/C12 C10/C11 C2/C4/C5/C6/C7 |
| --- | --- |
| H2sal-fah **II**  [K(H2O)][VO2(sal-fah)] **3**  **a  [VO2(Hsal-fah)] **8** (crude)  **  [VO2(Hsal-fah)] **8**b (crystallised from methanol)  ** | 145.0 156.1 152.7 144.8, 146.9 128.0, 130.1 110.9, 114.0, 115.1, 117.5, 118.1  156.0 164.4 163.0 145.0 132.5, 133.1 111.8, 113.4, 116.8, 119.5, 119.9  (11.0) (8.3) (10.3)  151.6 163.3 163.1 145.2, 146.1 132.7, 134.2 112,1, 115.2, 115.6, 120.1, 120.3  (6.6) (7.2) (10.4)  151.9 163.2 161.3 145.9, 146.2 132.8, 134.1 112.1, 114.7, 116.2, 119.8, 120.2  (6.9) (7.1) (10.6) |

a ** = **(complex) - **(free ligand). b) Singnals for the methanol and methoxy carbons appear at 48.5 and 74.3 ppm.

**Table S3** Electronic absorption spectra

| Compound | **max/nm (**/M-1 cm-1) |
| --- | --- |
| H2sal-nah **I** [VO(sal-nah)H2O] **1**  [{VO(sal-nah)}2**O] **2**  [K(H2O)][VO2(sal-nah)] **3** [VO2(Hsal-nah)] **7** H2sal-fah **II** [VO(sal-fah)H2O] **4**  [{VO(sal-fah)}2**O] **5**  [K(H2O)][VO2(sal-fah)] **6**  [VO2(Hsal-fah)] **8** | 214(28400), 288.5(21240), 297.5(20850), 328(15580)  214(28195), 245(19540), 276(15320), 325(12825), 404.5(5030)  244.5(12340), 323.5(7900), 404.5(2310)  211.5(23400), 231(23120), 320(13450), 398.5(5380)  210, 253, 324, 405  211.5(28115), 234.5(17320), 288.5(30100), 299(31900), 328.5(23580)  214(24080), 278.5(22550), 299(21800), 323.5(21420), 406(5270)  207(23065), 277(23175), 323(22320), 409(6020)  205.5(24320), 272(12320), 301(11475), 318.5(11735), 396(6581)  231, 282.5, 301, 324, 406.5 |
